# Supplementary material for: Laser desorption ionization mass spectrometry of peptides on a hybrid CHCA organic–inorganic matrix
Source: Royal Society of Chemistry journal article supplement (doi:10.1039/c3an01465g), 2014-01-01
Supplement: c3an01465g1.pdf [file c3an01465g1.pdf]

# Laser desorption ionization mass spectrometry of peptides on hybrid CHCA organic-inorganic matrix

Clément Fleith,<sup>a</sup> Sonia Cantel,<sup>a</sup> Gilles Subra,<sup>a</sup> Ahmad Mehdi,<sup>b</sup> Jeremie Ciccione,<sup>a</sup> Jean Martinez<sup>a</sup> and Christine Enjalbal<sup>\*a</sup>

5

† Electronic Supplementary Information (ESI) available:

**Figures S1.** LDI-MS spectra of the studied peptide mixture A at 10<sup>-5</sup> M recorded from CHCA matrix (top) and from CHCA-SiO<sub>2</sub> matrix (bottom)

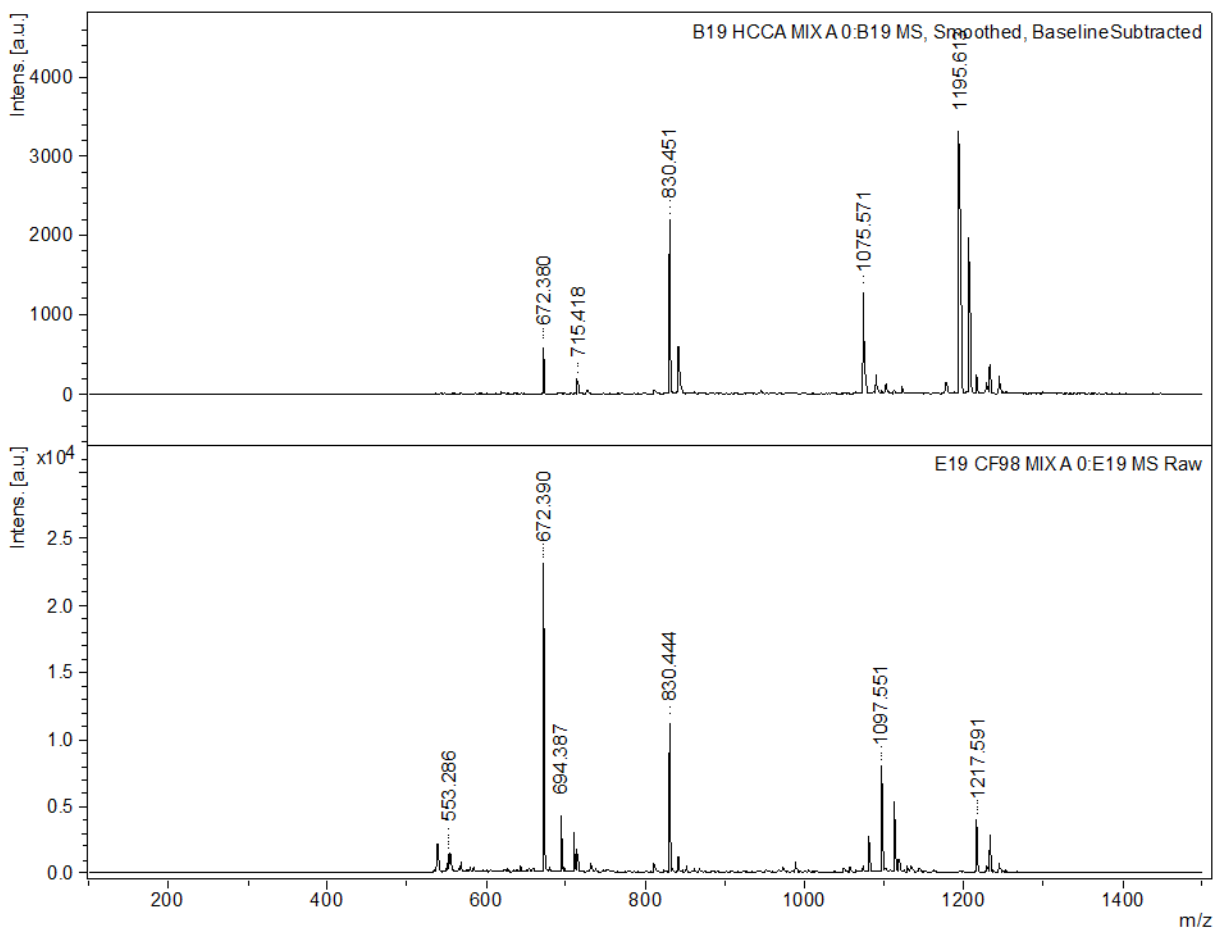

| Mixture at 10 <sup>-5</sup> M | Peptide | M (g/mol) | (M+H) <sup>+</sup> | (M+Na) <sup>+</sup> | (M+K) <sup>+</sup> |
|-------------------------------|---------|-----------|--------------------|---------------------|--------------------|
| A                             | P1      | 530,29    | 531,30             | 553,28              | 569,25             |
|                               | P2      | 671,40    | 672,40             | 694,39              | 710,36             |
|                               | P3      | 829,44    | 830,45             | 852,43              | 868,41             |
|                               | P4      | 1074,57   | 1075,58            | 1097,56             | 1113,53            |
|                               | P5      | 1194,61   | 1195,62            | 1217,60             | 1233,57            |

10

**Figures S2.** LDI-MS spectra of the studied peptide mixture B at  $10^{-5}$  M recorded from CHCA matrix (top) and from CHCA-SiO<sub>2</sub> matrix (bottom)

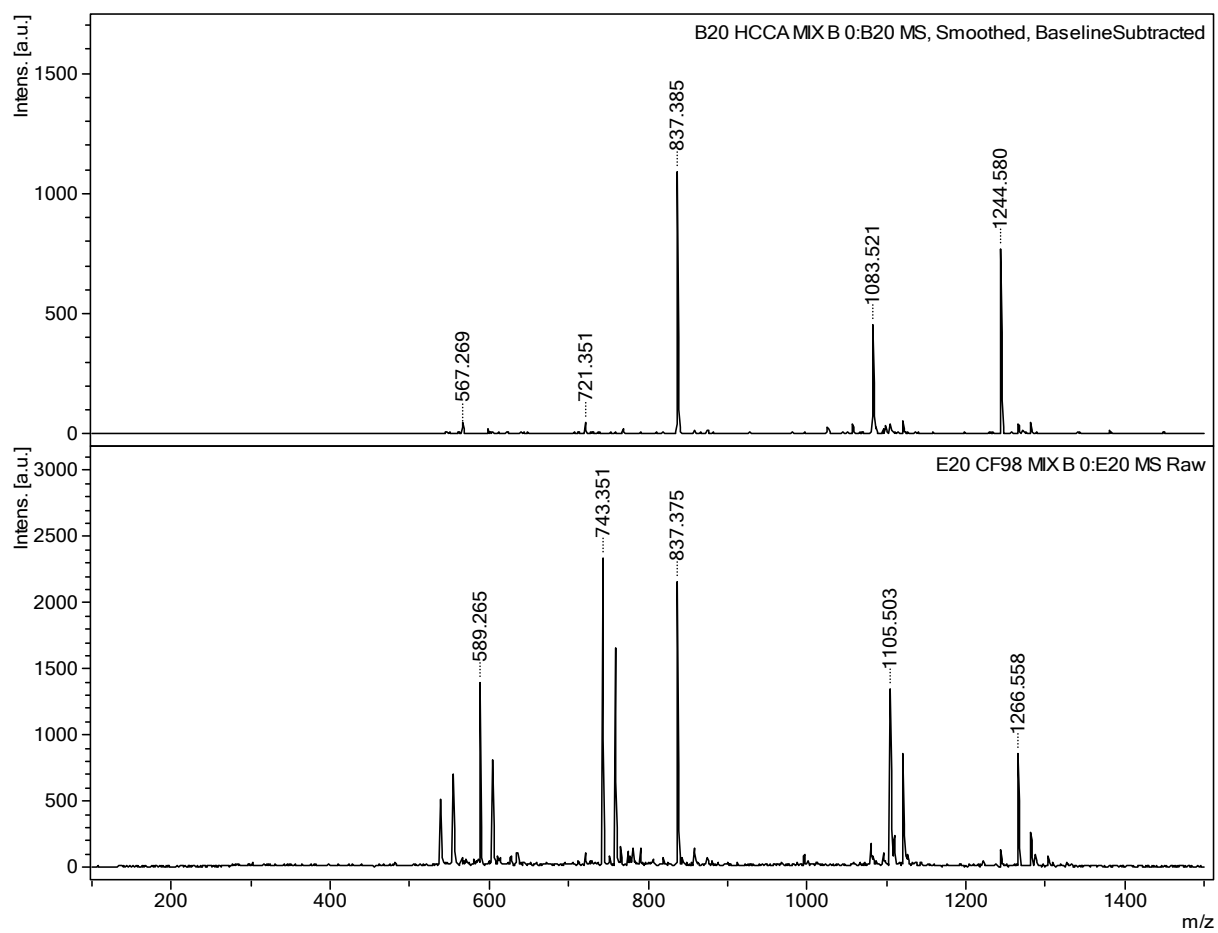

| Mixture at $10^{-5}$ M | Peptide | M (g/mol) | (M+H) <sup>+</sup> | (M+Na) <sup>+</sup> | (M+K) <sup>+</sup> |
|------------------------|---------|-----------|--------------------|---------------------|--------------------|
| <b>B</b>               | P6      | 566,27    | 567,28             | 589,26              | 605,23             |
|                        | P7      | 720,36    | 721,37             | 743,35              | 759,33             |
|                        | P8      | 836,39    | 837,39             | 859,37              | 875,35             |
|                        | P9      | 1082,29   | 1083,30            | 1105,28             | 1121,25            |
|                        | P10     | 1243,58   | 1244,59            | 1266,57             | 1282,55            |

**Figures S3.** LDI-MS spectra of the studied peptide mixture C at  $10^{-5}$  M recorded from CHCA matrix (top) and from CHCA-SiO<sub>2</sub> matrix (bottom)

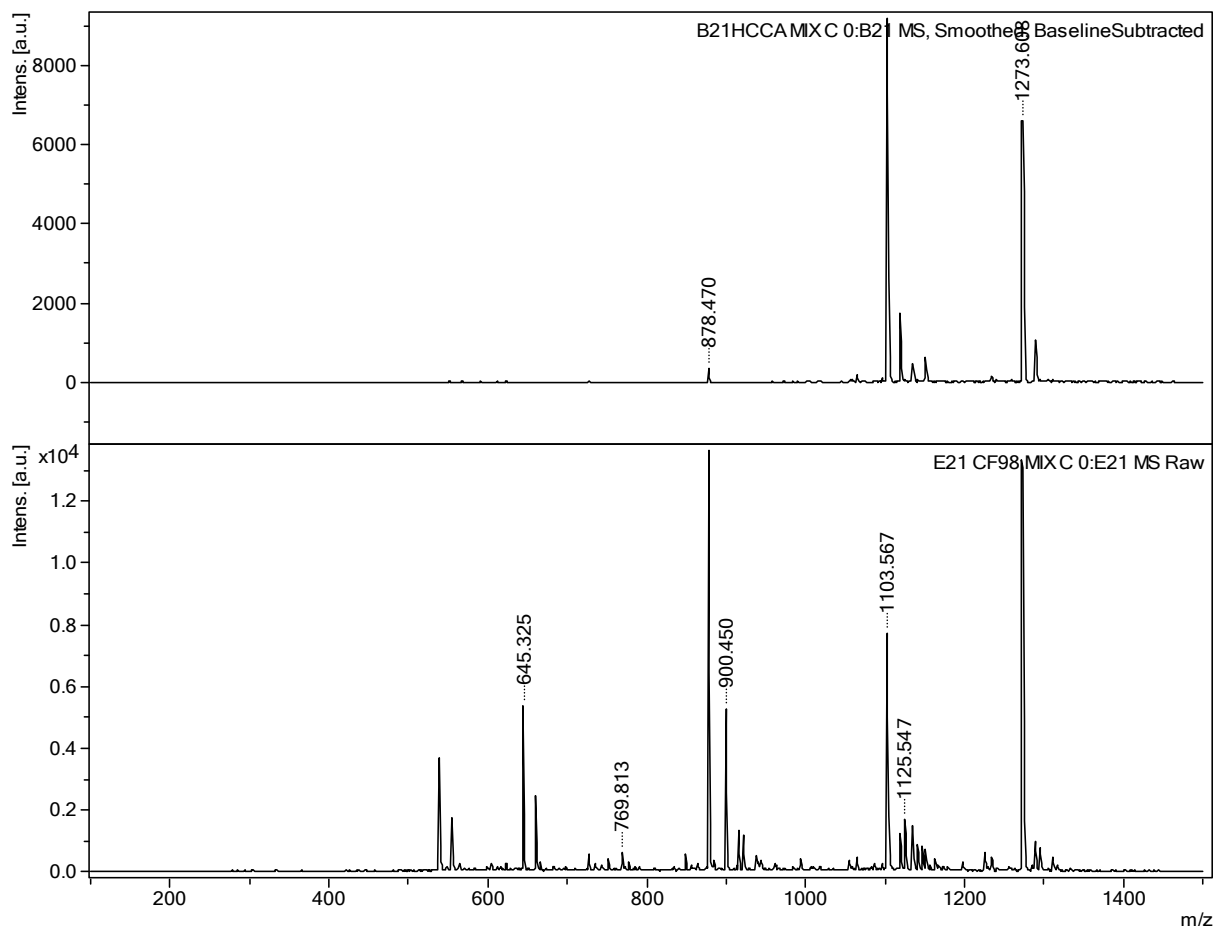

| Mixture at $10^{-5}$ M | Peptide | M (g/mol) | (M+H) <sup>+</sup> | (M+Na) <sup>+</sup> | (M+K) <sup>+</sup> |
|------------------------|---------|-----------|--------------------|---------------------|--------------------|
| C                      | P11     | 622,23    | 623,24             | 645,22              | 661,19             |
|                        | P12     | 730,42    | 731,43             | 753,41              | 769,38             |
|                        | P13     | 877,48    | 878,49             | 900,47              | 916,44             |
|                        | P14     | 1102,58   | 1103,59            | 1125,57             | 1141,54            |
|                        | P15     | 1243,58   | 1244,59            | 1266,57             | 1282,54            |

**Figures S4.** LDI-MS spectra of the studied peptide mixture D at  $10^{-5}$  M recorded from CHCA matrix (top) and from CHCA-SiO<sub>2</sub> matrix (bottom)

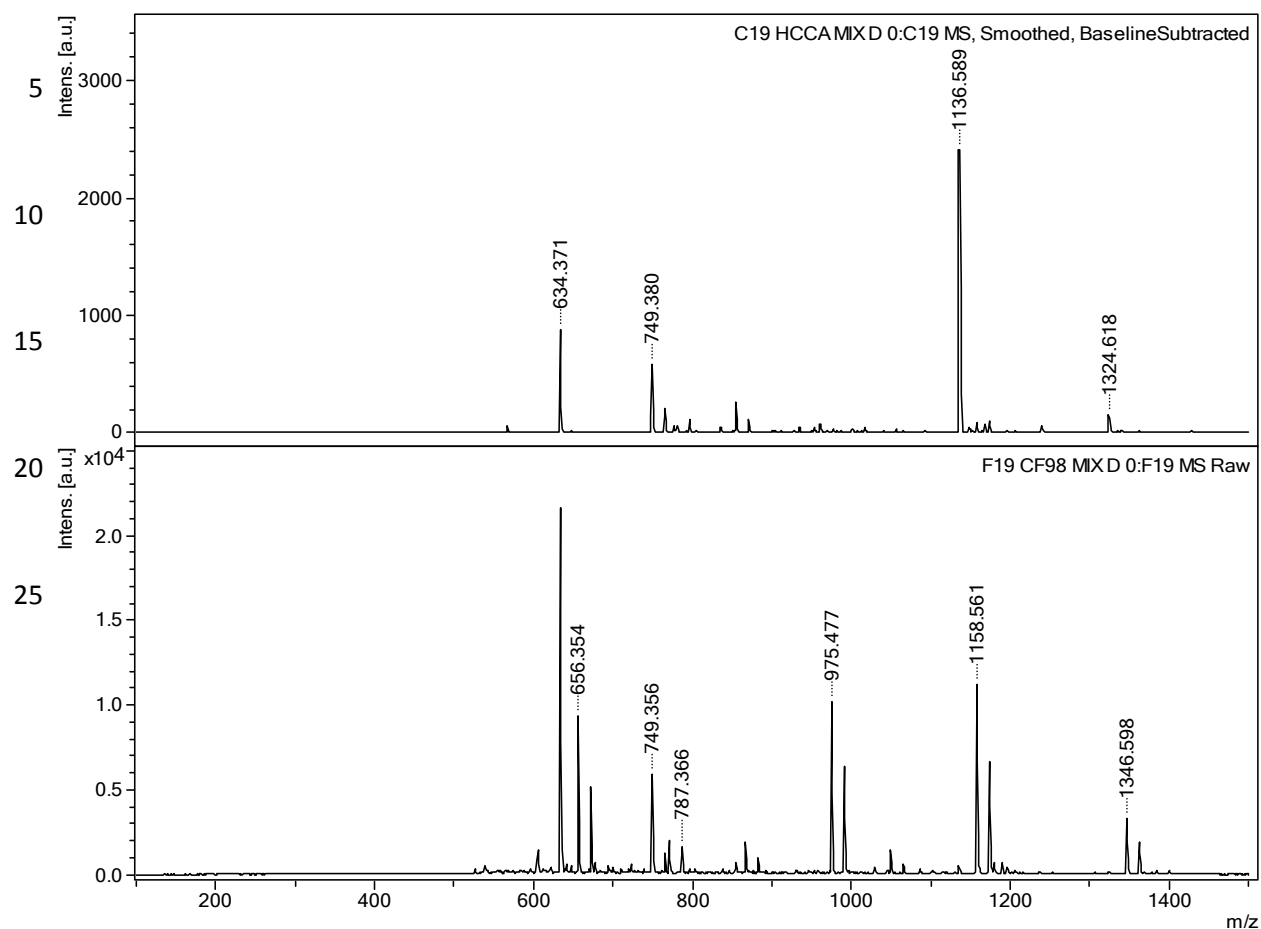

| Mixture at $10^{-5}$ M | Peptide | M (g/mol) | (M+H) <sup>+</sup> | (M+Na) <sup>+</sup> | (M+K) <sup>+</sup> |
|------------------------|---------|-----------|--------------------|---------------------|--------------------|
| <b>D</b>               | P16     | 633,36    | 634,37             | 656,35              | 672,32             |
|                        | P17     | 748,37    | 749,38             | 771,36              | 787,33             |
|                        | P18     | 952,49    | 953,50             | 975,48              | 991,45             |
|                        | P19     | 1135,58   | 1136,59            | 1158,57             | 1174,54            |
|                        | P20     | 1323,61   | 1324,62            | 1346,60             | 1362,57            |

**Figures S5.** LDI-MS spectra of the studied peptide mixture E at  $10^{-5}$  M recorded from CHCA matrix (top) and from CHCA-SiO<sub>2</sub> matrix (bottom)

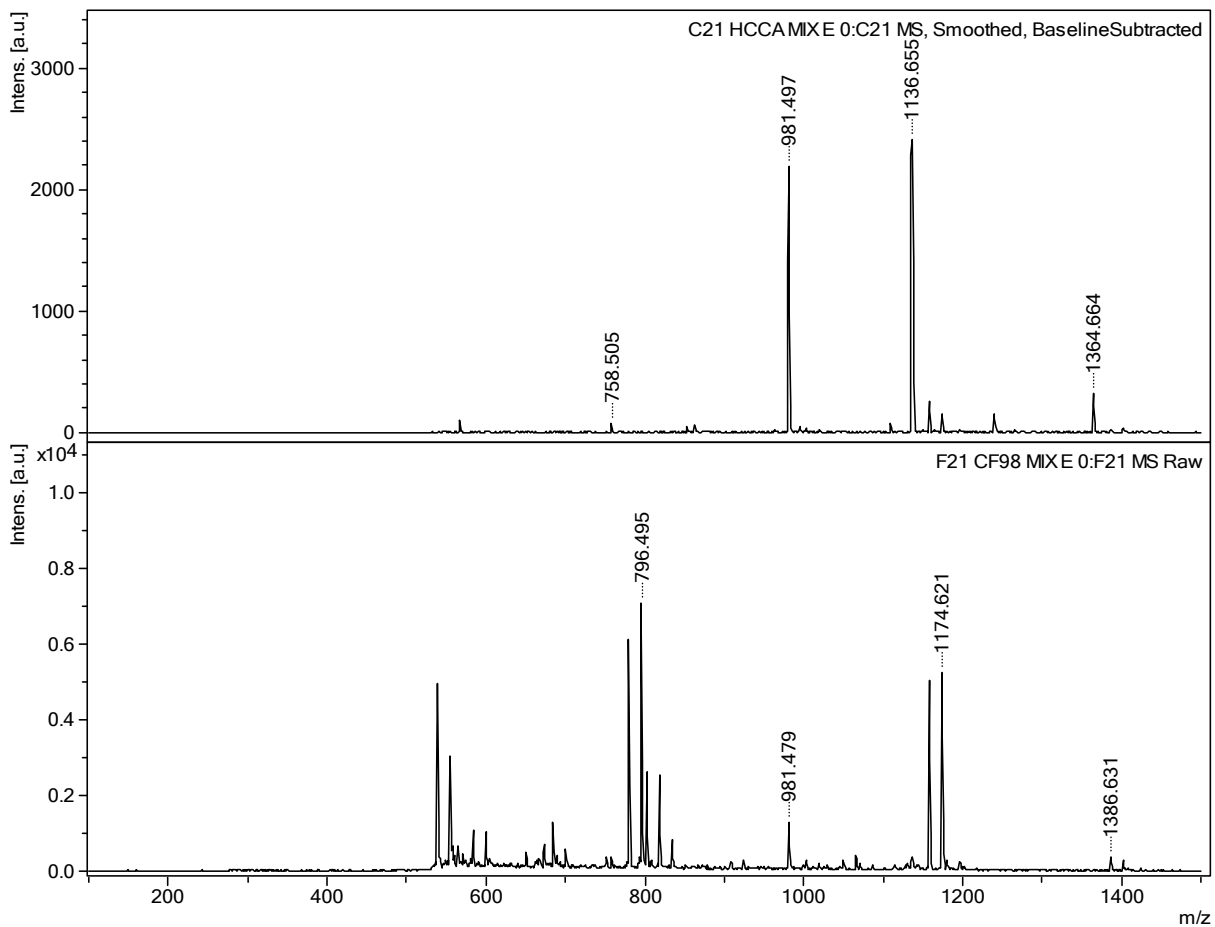

| Mixture at $10^{-5}$ M | Peptide | M (g/mol) | (M+H) <sup>+</sup> | (M+Na) <sup>+</sup> | (M+K) <sup>+</sup> |
|------------------------|---------|-----------|--------------------|---------------------|--------------------|
| <b>E</b>               | P21     | 642,33    | 643,34             | 665,32              | 681,29             |
|                        | P22     | 757,52    | 758,53             | 780,51              | 796,48             |
|                        | P23     | 980,49    | 981,50             | 1003,48             | 1019,45            |
|                        | P24     | 1135,65   | 1136,66            | 1158,64             | 1174,61            |
|                        | P25     | 1363,66   | 1364,67            | 1386,65             | 1402,62            |

**Figures S6.** LDI-MS spectra of the studied peptide mixture F at  $10^{-5}$  M recorded from CHCA matrix (top) and from CHCA-SiO<sub>2</sub> matrix (bottom)

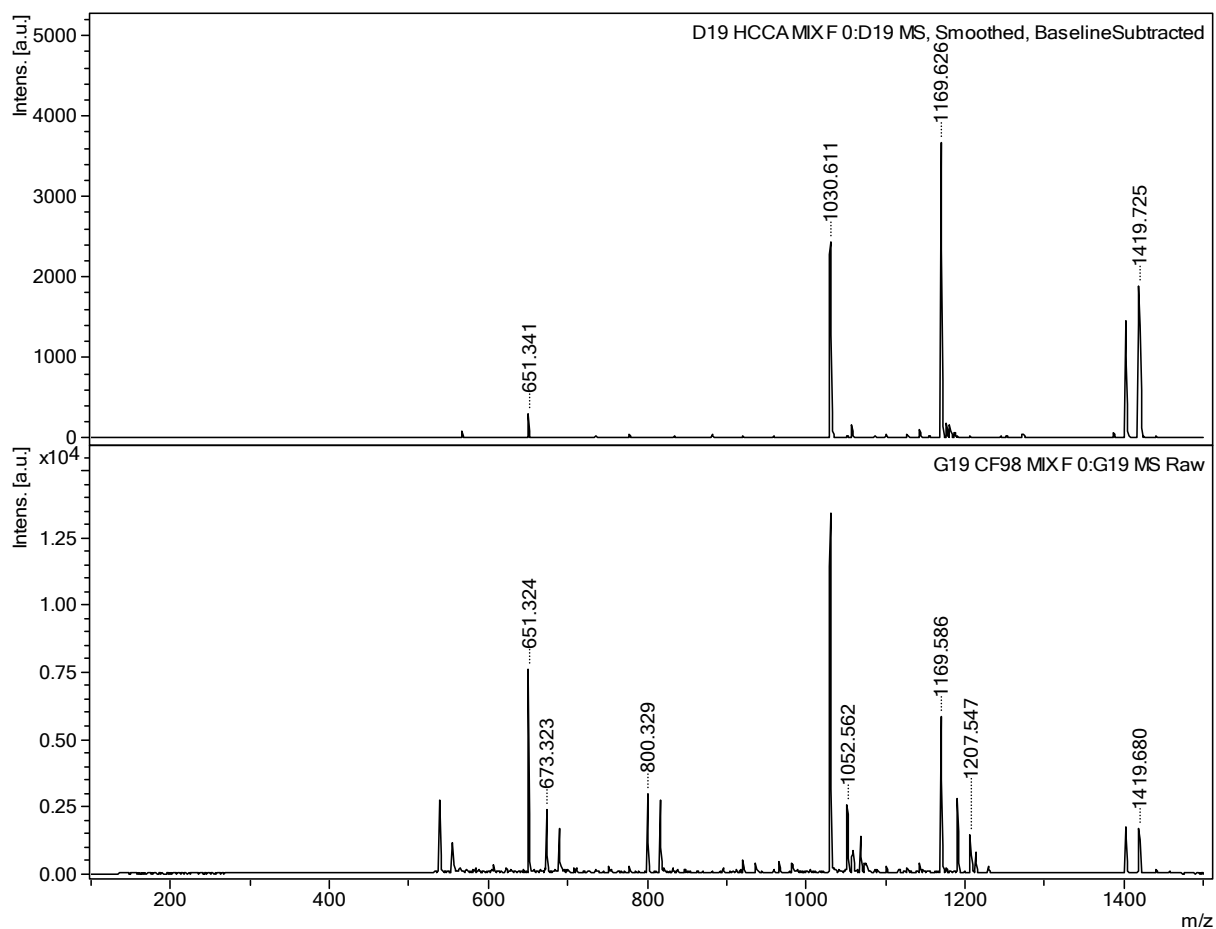

| Mixture at $10^{-5}$ M | Peptide | M (g/mol) | (M+H) <sup>+</sup> | (M+Na) <sup>+</sup> | (M+K) <sup>+</sup> |
|------------------------|---------|-----------|--------------------|---------------------|--------------------|
| F                      | P26     | 650,34    | 651,35             | 673,33              | 689,30             |
|                        | P27     | 777,35    | 778,36             | 800,34              | 816,31             |
|                        | P28     | 1029,60   | 1030,61            | 1052,59             | 1068,56            |
|                        | P29     | 1168,61   | 1169,62            | 1191,60             | 1207,57            |
|                        | P30     | 1418,72   | 1419,73            | 1441,71             | 1457,68            |

**Figures S7.** LDI-MS spectra of the studied peptide mixture G at  $10^{-5}$  M recorded from CHCA matrix (top) and from CHCA-SiO<sub>2</sub> matrix (bottom)

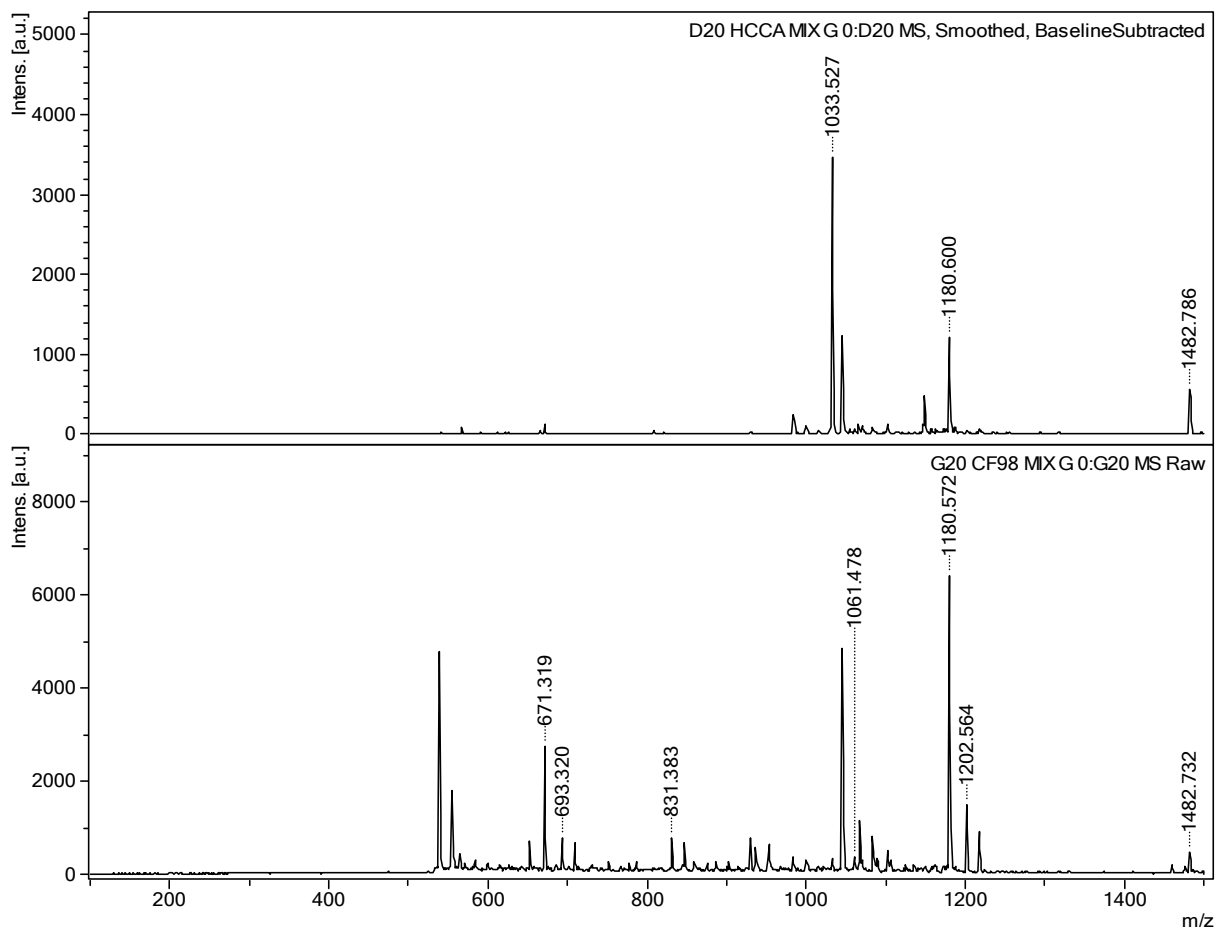

| Mixture at $10^{-5}$ M | Peptide | M (g/mol) | (M+H) <sup>+</sup> | (M+Na) <sup>+</sup> | (M+K) <sup>+</sup> |
|------------------------|---------|-----------|--------------------|---------------------|--------------------|
| <b>G</b>               | P31     | 670,34    | 671,35             | 693,33              | 709,30             |
|                        | P32     | 808,38    | 809,39             | 831,37              | 847,34             |
|                        | P33     | 1032,52   | 1033,53            | 1055,51             | 1071,48            |
|                        | P34     | 1179,60   | 1180,61            | 1202,59             | 1218,56            |
|                        | P35     | 1481,79   | 1482,80            | 1504,78             | 1520,75            |

**Table S1.** Triplicate analyses of peptide mixtures A to G deposited at  $10^{-5}$  M with CHCA and CHCA-SiO<sub>2</sub> as matrix

| Mixture deposited at $10^{-5}$ M | M (g/mol) | Mean of molecular ions (MH <sup>+</sup> /MNa <sup>+</sup> /MK <sup>+</sup> ) relative abundances (%) from analyses carried out in triplicate with the matrix |                       | Variation of molecular ions (MH <sup>+</sup> /MNa <sup>+</sup> /MK <sup>+</sup> ) relative abundances from analyses carried out in triplicate with the matrix |                       | Standard deviation |                       |
|----------------------------------|-----------|--------------------------------------------------------------------------------------------------------------------------------------------------------------|-----------------------|---------------------------------------------------------------------------------------------------------------------------------------------------------------|-----------------------|--------------------|-----------------------|
|                                  |           | CHCA                                                                                                                                                         | CHCA-SiO <sub>2</sub> | CHCA                                                                                                                                                          | CHCA-SiO <sub>2</sub> | CHCA               | CHCA-SiO <sub>2</sub> |
| <b>A</b>                         | 530,29    | Not detected                                                                                                                                                 | 4,4                   | Not detected                                                                                                                                                  | 1,3                   | 12 %               | 13 %                  |
|                                  | 671,40    | 19,4                                                                                                                                                         | 38,8                  | 5,8                                                                                                                                                           | 5,5                   |                    |                       |
|                                  | 829,44    | 32,0                                                                                                                                                         | 15,1                  | 0,8                                                                                                                                                           | 2,1                   |                    |                       |
|                                  | 1074,57   | 20,9                                                                                                                                                         | 23,6                  | 7,7                                                                                                                                                           | 2,3                   |                    |                       |
|                                  | 1194,61   | 27,7                                                                                                                                                         | 18,1                  | 1,7                                                                                                                                                           | 4,0                   |                    |                       |
| <b>B</b>                         | 566,27    | 1,2                                                                                                                                                          | 17,0                  | 2,5                                                                                                                                                           | 0,5                   | 19 %               | 5 %                   |
|                                  | 720,36    | 2,5                                                                                                                                                          | 26,9                  | 1,0                                                                                                                                                           | 4,0                   |                    |                       |
|                                  | 836,39    | 43,5                                                                                                                                                         | 16,9                  | 5,8                                                                                                                                                           | 2,1                   |                    |                       |
|                                  | 1082,53   | 19,5                                                                                                                                                         | 15,0                  | 5,1                                                                                                                                                           | 4,0                   |                    |                       |
|                                  | 1243,58   | 33,4                                                                                                                                                         | 24,2                  | 5,9                                                                                                                                                           | 9,9                   |                    |                       |
| <b>C</b>                         | 622,33    | Not detected                                                                                                                                                 | 22,7                  | Not detected                                                                                                                                                  | 7,3                   | 24 %               | 12 %                  |
|                                  | 730,42    | Not detected                                                                                                                                                 | 1,3                   | Not detected                                                                                                                                                  | 0,3                   |                    |                       |
|                                  | 877,48    | 7,3                                                                                                                                                          | 31,6                  | 10,5                                                                                                                                                          | 1,3                   |                    |                       |
|                                  | 1102,58   | 50,7                                                                                                                                                         | 14,9                  | 6,4                                                                                                                                                           | 2,6                   |                    |                       |
|                                  | 1272,60   | 42,0                                                                                                                                                         | 29,5                  | 4,1                                                                                                                                                           | 4,6                   |                    |                       |
| <b>D</b>                         | 633,36    | 23,8                                                                                                                                                         | 28,2                  | 3,8                                                                                                                                                           | 6,0                   | 23 %               | 10 %                  |
|                                  | 748,37    | 13,0                                                                                                                                                         | 7,3                   | 5,4                                                                                                                                                           | 1,3                   |                    |                       |
|                                  | 952,49    | 1,1                                                                                                                                                          | 20,0                  | 0,8                                                                                                                                                           | 1,3                   |                    |                       |
|                                  | 1135,58   | 58,1                                                                                                                                                         | 31,2                  | 14,3                                                                                                                                                          | 3,2                   |                    |                       |
|                                  | 1323,61   | 3,9                                                                                                                                                          | 13,4                  | 4,8                                                                                                                                                           | 3,7                   |                    |                       |
| <b>E</b>                         | 642,33    | Not detected                                                                                                                                                 | 2,6                   | 0,0                                                                                                                                                           | 0,6                   | 24 %               | 13 %                  |
|                                  | 757,52    | 2,0                                                                                                                                                          | 34,1                  | 3,4                                                                                                                                                           | 6,2                   |                    |                       |
|                                  | 980,49    | 35,2                                                                                                                                                         | 13,5                  | 1,2                                                                                                                                                           | 2,1                   |                    |                       |
|                                  | 1135,65   | 54,1                                                                                                                                                         | 32,7                  | 11,6                                                                                                                                                          | 1,0                   |                    |                       |
|                                  | 1363,66   | 8,6                                                                                                                                                          | 17,1                  | 7,0                                                                                                                                                           | 5,0                   |                    |                       |
| <b>F</b>                         | 650,34    | 3,8                                                                                                                                                          | 24,6                  | 15,2                                                                                                                                                          | 4,5                   | 17 %               | 11 %                  |
|                                  | 777,35    | 1,3                                                                                                                                                          | 12,0                  | 3,4                                                                                                                                                           | 2,5                   |                    |                       |
|                                  | 1029,60   | 28,5                                                                                                                                                         | 30,5                  | 7,4                                                                                                                                                           | 4,5                   |                    |                       |
|                                  | 1168,61   | 40,5                                                                                                                                                         | 28,0                  | 6,1                                                                                                                                                           | 3,7                   |                    |                       |
|                                  | 1418,72   | 25,9                                                                                                                                                         | 4,9                   | 6,0                                                                                                                                                           | 1,9                   |                    |                       |
| <b>G</b>                         | 670,34    | 3,2                                                                                                                                                          | 18,9                  | 7,3                                                                                                                                                           | 1,0                   | 25 %               | 18 %                  |
|                                  | 808,38    | 1,3                                                                                                                                                          | 5,6                   | 2,3                                                                                                                                                           | 5,2                   |                    |                       |
|                                  | 1032,52   | 62,5                                                                                                                                                         | 1,5                   | 14,7                                                                                                                                                          | 0,1                   |                    |                       |
|                                  | 1179,60   | 21,3                                                                                                                                                         | 46,6                  | 4,2                                                                                                                                                           | 8,1                   |                    |                       |
|                                  | 1481,79   | 11,8                                                                                                                                                         | 27,3                  | 8,7                                                                                                                                                           | 3,3                   |                    |                       |



**Figure S8.** MS/MS spectrum of peptide P8 (Mixture B) deposited with CHCA-SiO<sub>2</sub> matrix.

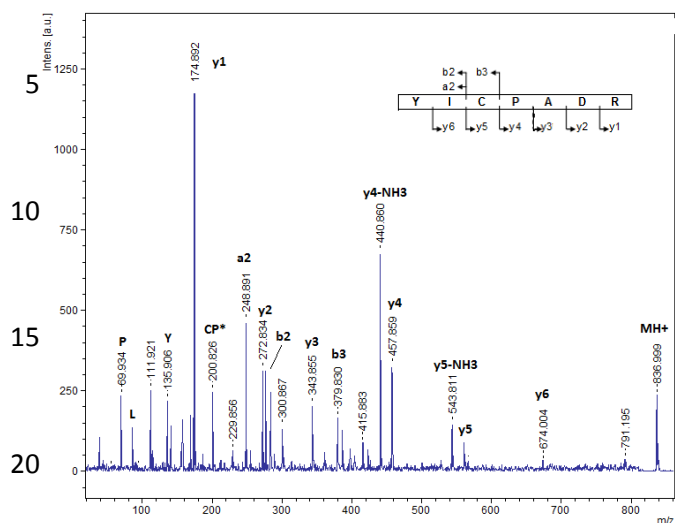

**25 Figure S9.** Peptide mixture B deposited with different matrix: CHCA, CHCA-SiO<sub>2</sub>, SiO<sub>2</sub> and CHCA-SiO<sub>2</sub> supplemented with diammonium citrate and diammonium sulphate.

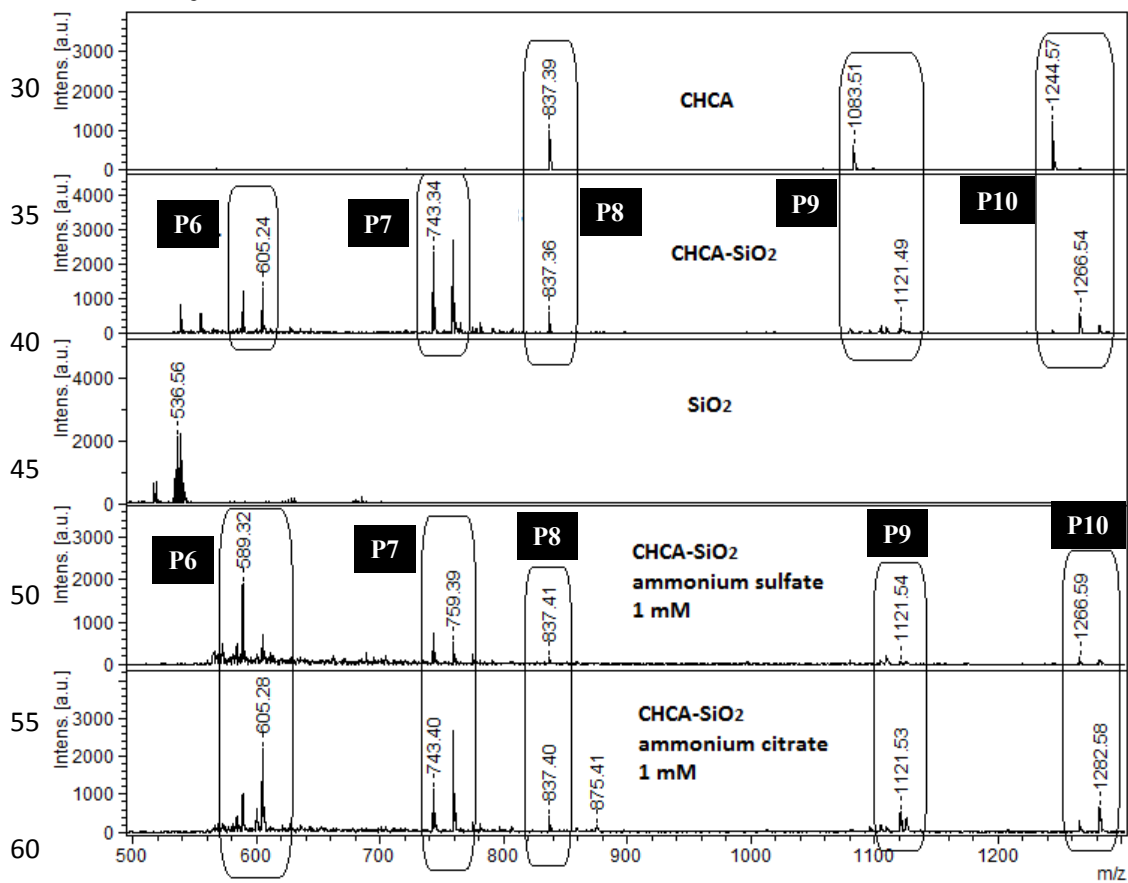

**Table S2.** Relative ion abundances for peptide mixture B deposited on CHCA-SiO<sub>2</sub> with different additives.

| Concentration of Mixture B | Peptide | M (g/mol) | Relative ion abundance                     |                                            |                             |                       |       |
|----------------------------|---------|-----------|--------------------------------------------|--------------------------------------------|-----------------------------|-----------------------|-------|
|                            |         |           | CHCA-SiO <sub>2</sub> + diammonium sulfate | CHCA-SiO <sub>2</sub> + diammonium citrate | CHCA-SiO <sub>2</sub> + TFA | CHCA-SiO <sub>2</sub> | CHCA  |
| 10 <sup>-5</sup> M         | P6      | 566,27    | 32,1%                                      | 25,8%                                      | 9,1%                        | 17,0%                 | 1,2%  |
|                            | P7      | 720,36    | 31,3%                                      | 27,9%                                      | 45,2%                       | 26,9%                 | 2,5%  |
|                            | P8      | 836,39    | 6,2%                                       | 13,4%                                      | 13,9%                       | 16,9%                 | 43,5% |
|                            | P9      | 1082,53   | 18,8%                                      | 19,8%                                      | 26,2%                       | 15,0%                 | 19,5% |
|                            | P10     | 1243,58   | 11,6%                                      | 13,1%                                      | 5,6%                        | 24,2%                 | 33,4% |
| 10 <sup>-6</sup> M         | P6      | 566,27    | 55,2%                                      | 30,1%                                      | 0%                          | 33,1%                 | 1,2%  |
|                            | P7      | 720,36    | 28,8%                                      | 31,3%                                      | 0%                          | 34,9%                 | 23,9% |
|                            | P8      | 836,39    | 4,2%                                       | 7,9%                                       | 0%                          | 7,0%                  | 18,5% |
|                            | P9      | 1082,53   | 3,1%                                       | 13,8%                                      | 0%                          | 7,9%                  | 17,5% |
|                            | P10     | 1243,58   | 8,8%                                       | 16,9%                                      | 0%                          | 17,1%                 | 24,2% |
